# Supplementary material for: Tuning the local chemistry of SPAN to realize the development of room-temperature sodium–sulfur pouch cells
Source: Royal Society of Chemistry journal article supplement (doi:10.1039/d4ta05581k), 2024-12-03
Supplement: d4ta05581k1.pdf [file d4ta05581k1.pdf]

## Supporting Information

### Tuning the Local-chemistry of the SPAN to Realize the Development of Room-Temperature Sodium-Sulfur Pouch Cells

*Sanjaykumar C<sup>a,‡</sup>, Sungjemmenla<sup>a,‡</sup>, Mahesh Chandra<sup>a</sup>, Chhail Bihari Soni<sup>a</sup>, Vineeth S.K<sup>c</sup>, Sweta Das<sup>b</sup>, Nevo Cohen<sup>c</sup>, Hemant Kumar<sup>b</sup>, Daniel Mandler<sup>c</sup> and Vipin Kumar<sup>a,d\*</sup>*

<sup>a</sup>Department of Energy Science and Engineering, Indian Institute of Technology Delhi, Hauz Khas, New Delhi 110016, India

<sup>b</sup>School of Basic Sciences, Indian Institute of Technology Bhubaneswar, Odisha 752050, India

<sup>c</sup>The Institute of Chemistry, The Hebrew University of Jerusalem, Jerusalem, Israel 9190401

<sup>d</sup>University of Queensland–IIT Delhi Academy of Research (UQIDAR), Indian Institute of Technology Delhi, Hauz Khas, New Delhi 110016, India

<sup>‡</sup> Authors contributed equally.

\*E-mail address- vkumar@iitd.ac.in

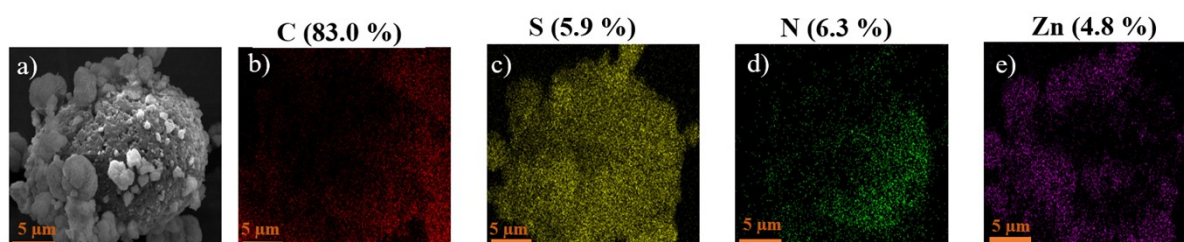

**Figure S1.** FESEM image of SPAN + 400 mg ZnS (a) and corresponding EDS mapping images (b), (c), (d), and (e)

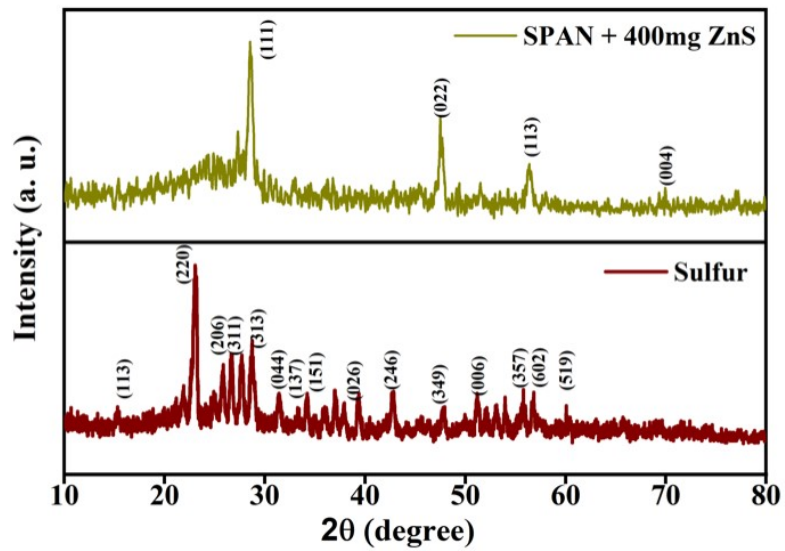

**Figure S2.** XRD data of Sulfur and SPAN + 400 mg ZnS

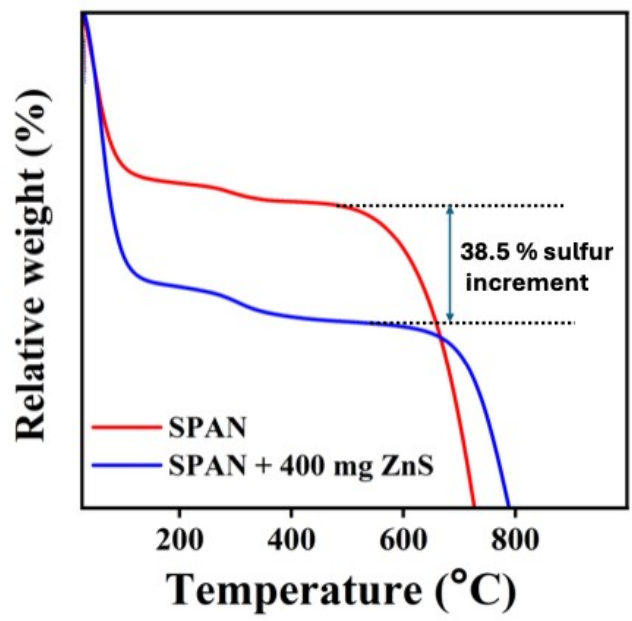

**Figure S3** TGA data on SPAN and SPAN + 400 mg ZnS

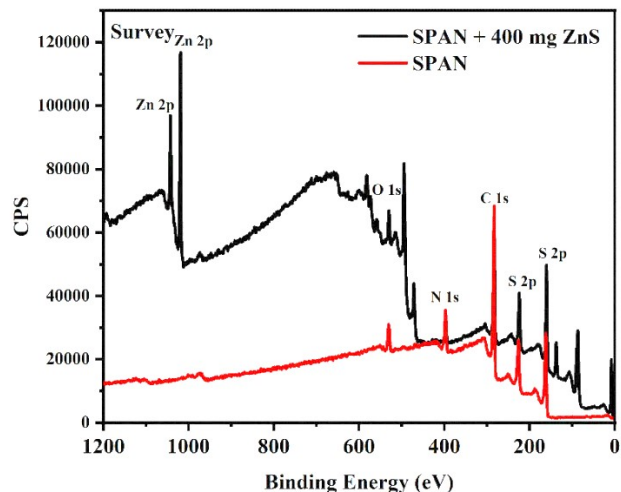

**Figure S4.** XPS survey spectrum of SPAN and SPAN + 400 mg ZnS

**Table S1.** Compositional ratio of SPAN composites based on XPS data

| S. No | Elements | SPAN + ZnS 400 mg (Wt%) | SPAN (Wt %) |
|-------|----------|-------------------------|-------------|
| 1)    | Sulfur   | 13.1                    | 10          |
| 2)    | Nitrogen | 2.5                     | 61          |
| 3)    | Carbon   | 15.4                    | 23.4        |
| 4)    | Zinc     | 63                      | -           |
| 5)    | Oxygen   | 5.1                     | 5.3         |

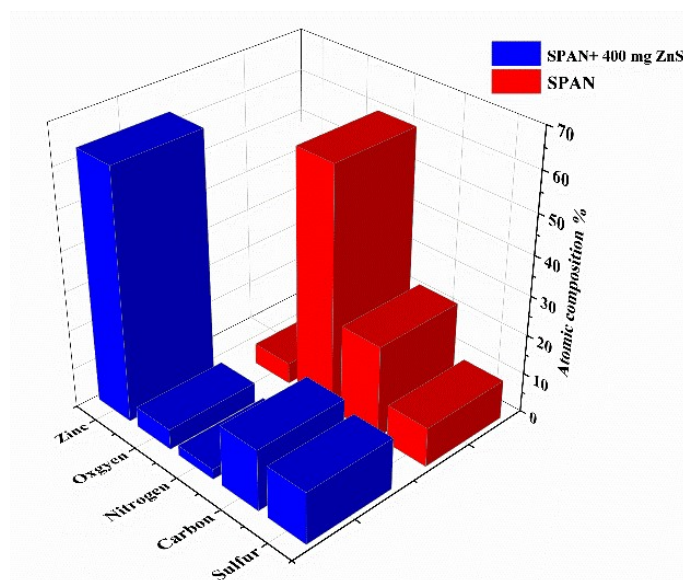

**Figure S5.** Histogram representation of Zinc, Oxygen, Nitrogen, Carbon and Sulfur in SPAN and SPAN + 400 mg ZnS

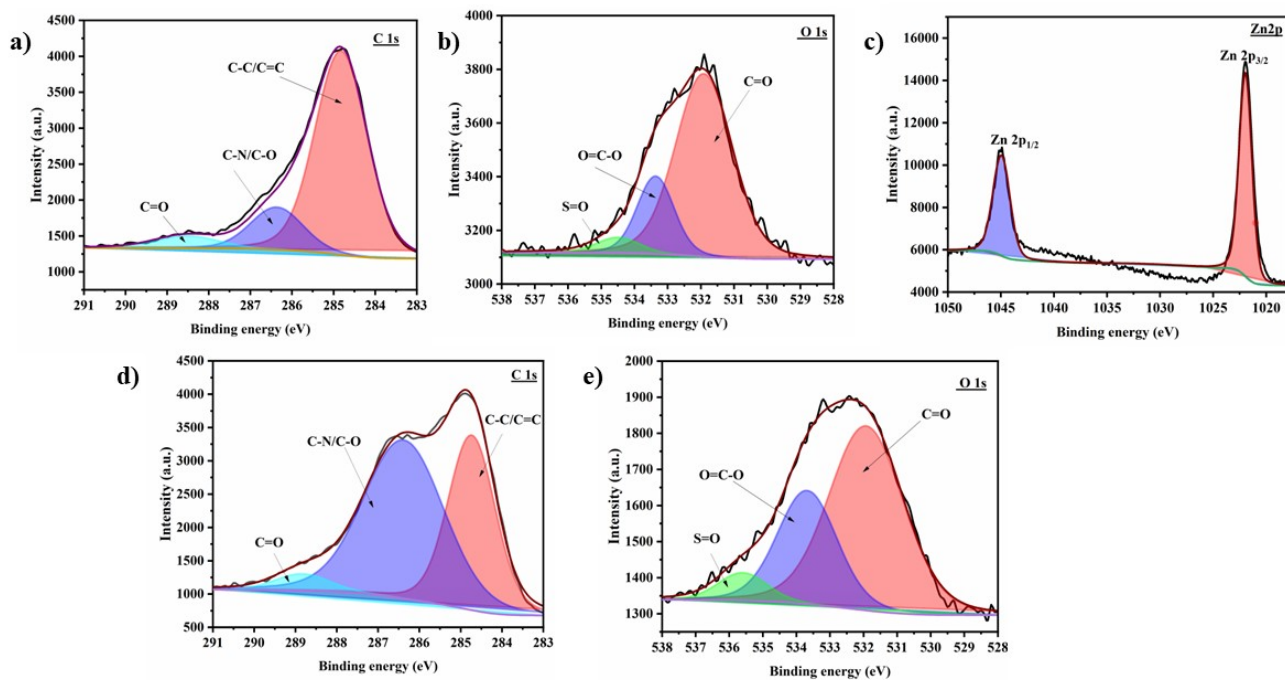

**Figure S6.** XPS spectra of SPAN + 400 mg ZnS (a) C 1s, (b) O 1s (c) Zn 2p and SPAN (d) C 1s, (e) O 1s

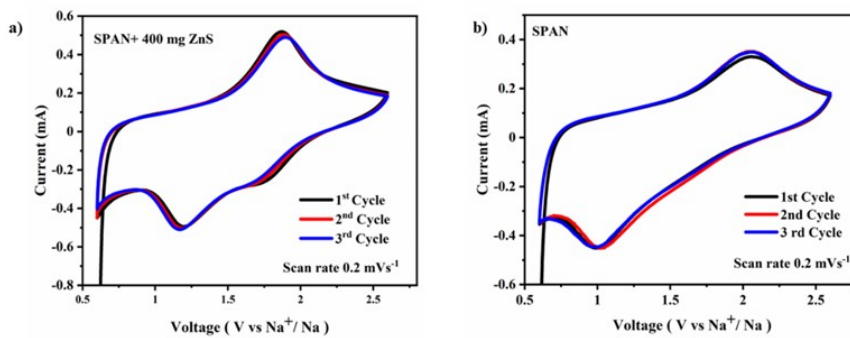

**Figure S7.** CV curves at  $0.2 \text{ mV s}^{-1}$  of a) SPAN + 400 mg ZnS and b) SPAN in ether electrolyte.

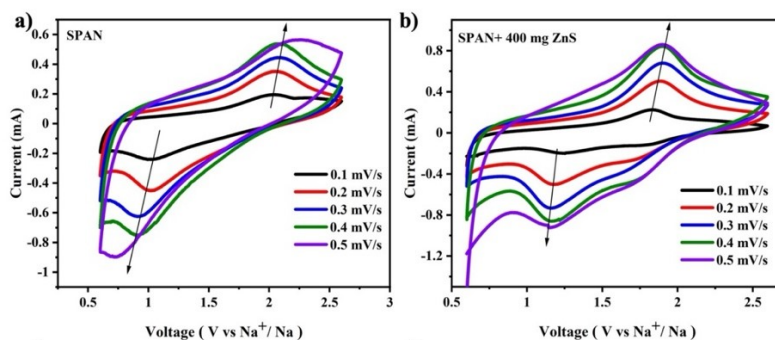

**Figure S8.** CV curves at various scan rates ranging from 0.1 to 0.5 mV s<sup>-1</sup> of a) SPAN and b) SPAN + 400 mg ZnS in ether electrolyte.

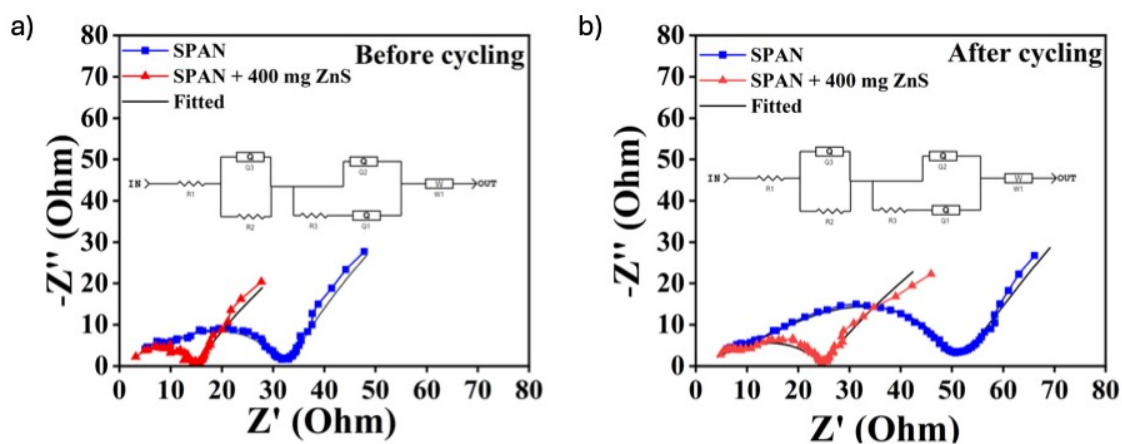

**Figure S9.** EIS data of SPAN and SPAN + 400 mg ZnS a) before cycling and b) after cycling

**Table S2** Values obtained from EIS data fitting

| SPAN                     |           |            |                           |            |           | SPAN + 400 mg ZnS         |           |            |                        |            |           |
|--------------------------|-----------|------------|---------------------------|------------|-----------|---------------------------|-----------|------------|------------------------|------------|-----------|
| Before cycling           |           |            | After cycling             |            |           | Before cycling            |           |            | After cycling          |            |           |
| R1                       | R2        | R3         | R1                        | R2         | R3        | R1                        | R2        | R3         | R1                     | R2         | R3        |
| 10<br>mΩ                 | 2.41<br>Ω | 29.66<br>Ω | 10<br>mΩ                  | 40.34<br>Ω | 9.82<br>Ω | 46<br>mΩ                  | 2.01<br>Ω | 12.01<br>Ω | 1.15<br>Ω              | 23.88<br>Ω | 8.12<br>Ω |
| R <sub>ct</sub> = 31.9 Ω |           |            | R <sub>ct</sub> = 50.16 Ω |            |           | R <sub>ct</sub> = 14.02 Ω |           |            | R <sub>ct</sub> = 32 Ω |            |           |

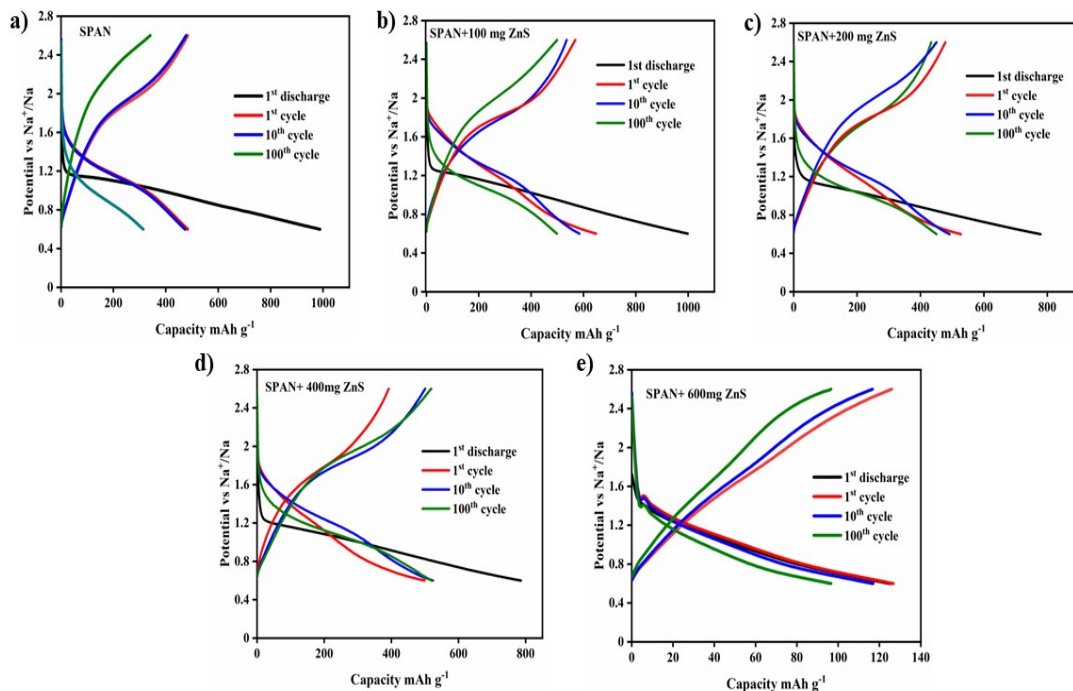

**Figure S10.** Voltage profile of SPAN (a), SPAN + 100 mg ZnS (b), SPAN + 200 mg ZnS (c), SPAN SPAN + 400 mg ZnS (d), SPAN +600 mg ZnS (e) in ether electrolyte at 0.14 C.

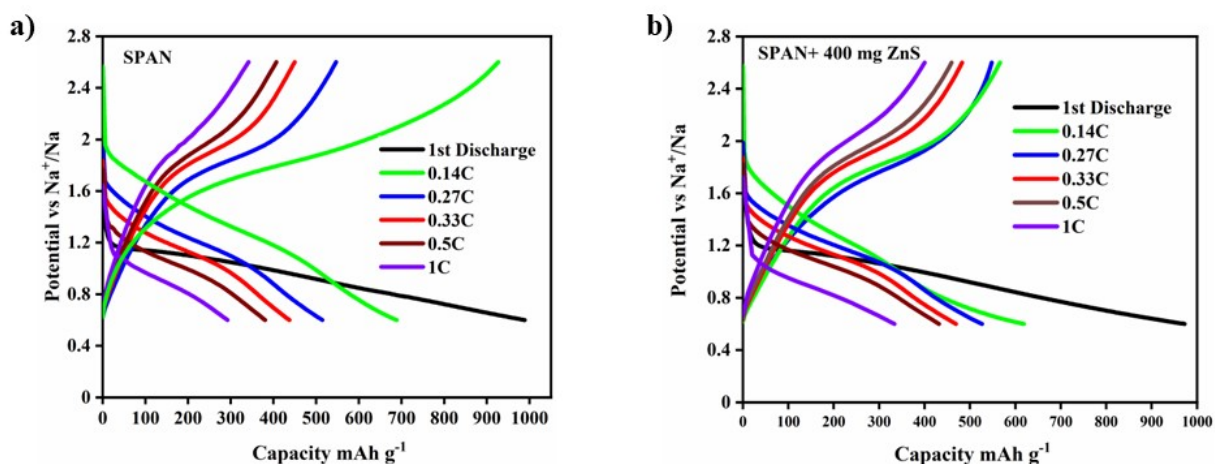

**Figure S11.** Voltage profile of SPAN (a), SPAN + 400 mg ZnS (b), composite in ether-based electrolyte.

**Table S3.** Pouch Cell parameters

|                          |                        |
|--------------------------|------------------------|
| Electrode size (Anode)   | 56 mm*53 mm            |
| Electrode size (Cathode) | 56 mm*43 mm            |
| Anode                    | Sodium metal           |
| Anode loading            | 15 mg cm <sup>-2</sup> |
| Cathode                  | SPAN+ 400 mg ZnS       |

|                   |                       |
|-------------------|-----------------------|
| Cathode loading   | 4 mg cm <sup>-2</sup> |
| Binder            | PVDF                  |
| Current Collector | Al foil               |
| Electrolyte       | 1M NaOTF in Diglyme   |

**Table S4.** Na–S battery systems based on different sulfur composites

| S. no | Cathodes                                    | Electrolyte                                                                | Initial capacity                                    | Final capacity                                    | Capacity decay  | Cycle life | Ref.         |
|-------|---------------------------------------------|----------------------------------------------------------------------------|-----------------------------------------------------|---------------------------------------------------|-----------------|------------|--------------|
| 1)    | HPCM/S composite                            | 1 M NaOTF in diglyme                                                       | 617 mA h g <sup>-1</sup> (0.7 C)                    | 311 mA h g <sup>-1</sup> (0.7 C)                  | -               | 60         | <sup>1</sup> |
| 2)    | Polysulfide catholyte in rGO-CNT-CMC sponge | 1 M NaOTF in diglyme                                                       | 755 mAh g <sup>-1</sup> (0.2 C)                     | 755 mA h g <sup>-1</sup> (0.2 C)                  | -               | 200        | <sup>2</sup> |
| 3)    | CS90-rGO                                    | 1 M NaClO <sub>4</sub> + 0.2 M NaNO <sub>3</sub> in tetraglyme             | 542 mA h g <sup>-1</sup> (0.2 A g <sup>-1</sup> )   | 335 mA h g <sup>-1</sup> (0.2 A g <sup>-1</sup> ) | 0.76% per cycle | 50         | <sup>3</sup> |
| 4)    | (S@iMCHS)                                   | 1.0 M NaClO <sub>4</sub> in PC: EC (1:1, v/v) with 5 wt. % FEC of additive | 418.75 mAh g <sup>-1</sup> (0.2 A g <sup>-1</sup> ) | 292 mAh g <sup>-1</sup> (0.2 A g <sup>-1</sup> )  | -               | 200        | <sup>4</sup> |
| 5)    | c-PANS NF                                   | 0.8 M NaClO <sub>4</sub> in EC: DEC                                        | 796 mAh/g <sup>-1</sup> (0.1 C)                     | 219 mAh/g <sup>-1</sup> (1 C)                     | -               | 500        | <sup>5</sup> |
| 6)    | S <sub>0.6</sub> Se <sub>0.4</sub> @C NFs   | 1 M NaClO <sub>4</sub> in EC: PC (1:1, v/v))                               | 417 mAh g <sup>-1</sup> (0.1 A g <sup>-1</sup> )    | 375 mAh g <sup>-1</sup> 0.1 A g <sup>-1</sup> )   | -               | 100        | <sup>6</sup> |
| 7)    | SeS-PAN particles                           | 1.0 M NaClO <sub>4</sub> in EC: DEC: PC (1:1:1,                            | 721 mAh g <sup>-1</sup> (0.2 A g <sup>-1</sup> )    | 550 mAh g <sup>-1</sup> (0.2 A g <sup>-1</sup> )  | -               | 150        | <sup>7</sup> |



|     |                                                                   |                                                                          |                                                          |                                                         |                                          |      |               |
|-----|-------------------------------------------------------------------|--------------------------------------------------------------------------|----------------------------------------------------------|---------------------------------------------------------|------------------------------------------|------|---------------|
|     |                                                                   | v/v) with<br>5.0 vol. %<br>FEC                                           |                                                          |                                                         |                                          |      |               |
| 8)  | Sulfurized<br>polyacrylon<br>itrile<br>nanofiber<br>(SPAN)<br>web | 1 M of<br>NaPF <sub>6</sub> in<br>EC: DEC<br>(1:1, v/v)                  | 342 mAh g <sup>-1</sup><br>(0.1 C)                       | 266 mAh<br>g <sup>-1</sup><br>(0.1 C)                   | -                                        | 200  | 8             |
| 9)  | Multi-<br>channel<br>sulfurized<br>polyacrylon<br>itrile          | 1 M NaOTF<br>in diglyme                                                  | 523 mAh g <sup>-1</sup><br>(0.1 A g <sup>-1</sup> )      | 437 mAh<br>g <sup>-1</sup> (0.1<br>A g <sup>-1</sup> )  | -                                        | 100  | 9             |
| 10) | H-SPAN                                                            | 1.0 M<br>NaClO <sub>4</sub> in<br>EC: PC<br>(1:1, v/v)                   | 599.2 mAh<br>g <sup>-1</sup><br>(0.05 C)                 | 717 mAh<br>g <sup>-1</sup><br>(0.1 C)                   | -                                        | 200  | <sup>10</sup> |
| 11) | Te <sub>0.04</sub> S <sub>0.96</sub> @<br>pPAN                    | 1 M<br>NaClO <sub>4</sub> in<br>EC: DMC<br>(1:1, v:v)<br>with 10%<br>FEC | 503 mA h<br>g <sup>-1</sup><br>(0.5 A g <sup>-1</sup> )  | 463 mA<br>h g <sup>-1</sup><br>(0.5 A g <sup>-1</sup> ) | 0.015%<br>decay per<br>cycle             | 600  | <sup>11</sup> |
| 12) | Se <sub>0.08</sub> S <sub>0.92</sub> @<br>pPAN                    | 1.0 M<br>NaClO <sub>4</sub> in<br>PC: EC<br>(1: 1, v/v)                  | 1185 mA h<br>g <sup>-1</sup><br>(0.4 A g <sup>-1</sup> ) | 770 mA<br>h g <sup>-1</sup><br>(0.4 A g <sup>-1</sup> ) | 0.045%<br>decay per<br>cycle             | 500  | <sup>12</sup> |
| 13) | SPAN@<br>TiO <sub>2</sub>                                         | 1 M<br>NaClO <sub>4</sub><br>in EC: PC<br>(1:1, v:v)                     | 1100 mAh<br>g <sup>-1</sup><br>(0.2 C)                   | 400<br>mAh g <sup>-1</sup><br>(0.2 C)                   | 0.13 mAh<br>g <sup>-1</sup> per<br>cycle | 1000 | <sup>13</sup> |

|            |                                    |                                     |                                             |                                             |                                       |            |                     |
|------------|------------------------------------|-------------------------------------|---------------------------------------------|---------------------------------------------|---------------------------------------|------------|---------------------|
| <b>14)</b> | <b>SPAN@<br/>ZnS<br/>composite</b> | <b>1 M<br/>NaOTf in<br/>diglyme</b> | <b>500 mAh<br/>g<sup>-1</sup><br/>(1 C)</b> | <b>227<br/>mAh g<sup>-1</sup><br/>(1 C)</b> | <b>0.07 %<br/>decay<br/>per cycle</b> | <b>450</b> | <b>Our<br/>work</b> |
|------------|------------------------------------|-------------------------------------|---------------------------------------------|---------------------------------------------|---------------------------------------|------------|---------------------|

## References

- 1 W. Du, Q. Xu, R. Zhan, Y. Zhang, Y. Luo and M. Xu, *Mater. Lett.*, 2018, **221**, 66–69.
- 2 J. Sun, Y. Lin, Z. Sun, S. Zhu, R. Amal, F. Li and D.-W. Wang, *Mater. Today Energy*, 2019, **14**, 100342.
- 3 A. Ghosh, S. Shukla, M. Monisha, A. Kumar, B. Lochab and S. Mitra, *ACS Energy Lett.*, 2017, **2**, 2478–2485.
- 4 Y. X. Wang, J. Yang, W. Lai, S. L. Chou, Q. F. Gu, H. K. Liu, D. Zhao and S. X. Dou, *J. Am. Chem. Soc.*, 2016, **138**, 16576–16579.
- 5 T. H. Hwang, D. S. Jung, J.-S. Kim, B. G. Kim and J. W. Choi, *Nano Lett.*, 2013, **13**, 4532–4538.
- 6 Y. Yao, L. Zeng, S. Hu, Y. Jiang, B. Yuan and Y. Yu, *Small*, 2017, **13**, 1–8.
- 7 V. H. Pham, J. A. Boscoboinik, D. J. Stacchiola, E. C. Self, P. Manikandan, S. Nagarajan, Y. Wang, V. G. Pol, J. Nanda, E. Paek and D. Mitlin, *Energy Storage Mater.*, 2019, **20**, 71–79.
- 8 I. Kim, C. H. Kim, S. H. Choi, J. P. Ahn, J. H. Ahn, K. W. Kim, E. J. Cairns and H. J. Ahn, *J. Power Sources*, 2016, **307**, 31–37.
- 9 L. Zhang, W. Zhang, Z. Zhu, Q. Huang, X. Liu, M. Zhang, W. B. Pei and J. Wu, *J. Solid State Chem.*, 2021, **301**, 122359.
- 10 X. Huang, J. Liu, Z. Huang, X. Ke, L. Liu, N. Wang, J. Liu, Z. Guo, Y. Yang and Z. Shi, *Electrochim. Acta*, , DOI:10.1016/j.electacta.2019.135493.
- 11 S. Li, Z. Zeng, J. Yang, Z. Han, W. Hu, L. Wang, J. Ma, B. Shan and J. Xie, *ACS Appl. Energy Mater.*, 2019, **2**, 2956–2964.
- 12 L. Wang, X. Chen, S. Li, J. Yang, Y. Sun, L. Peng, B. Shan and J. Xie, *J. Mater. Chem. A*, 2019, **7**, 12732–12739.
- 13 J. M. Blázquez-Moreno, A. L. Páez Jerez, A. Y. Tesio, A. Benitez and A. Caballero, *Batter. Supercaps*, 2024, **9**, 0–3.
